# Supplementary material for: A porous thienyl cyclodextrin polymer synthesized in a homogeneous ionic liquid catalytic system for the rapid removal of pharmaceuticals and personal care products (PPCPs)
Source: Royal Society of Chemistry journal article supplement (doi:10.1039/d1gc03141d), 2021-11-19
Supplement: d1gc03141d1.pdf [file d1gc03141d1.pdf]

**Porous Thienyl Cyclodextrin Polymer Synthesized in  
Homogeneous Ionic Liquid Catalyst System for Rapid  
Removal of Pharmaceuticals and Personal Care Products  
(PPCPs)**

Yizhou Tu<sup>a</sup>, Huimin Wang<sup>a</sup>, Pingping Yang<sup>a</sup>, Guizhou Xu<sup>a</sup>, Xuejiao Hu<sup>a</sup>, Aimin Li<sup>a,c</sup>,

Xianchuan Xie<sup>\*a,b,d</sup>

<sup>a</sup> *State Key Laboratory of Pollution Control and Resource Reuse, School of the Environment,  
Nanjing University, Nanjing, P. R. China*

<sup>b</sup> *Key Laboratory of Poyang Lake Environment and Resource Utilization, Ministry of  
Education, School of Resources Environmental & Chemical Engineering, Nanchang  
University, Nanchang 330031, P. R. China*

<sup>c</sup> *Quanzhou Institute for Environmental Protection Industry, Nanjing University, Quanzhou,  
362008, P. R. China*

<sup>d</sup> *Jiangxi Nanxin Environmental Protection Technology Co. LTD, Jiujiang City of Jiangxi  
Province, 330300, P. R. China*

\* Corresponding Author

Email: [xchxie@nju.edu.cn](mailto:xchxie@nju.edu.cn) & [24255542@qq.com](mailto:24255542@qq.com) (X. Xie).

Tel. and Fax: 086-25-83594492

## Content

**Fig. S1** IR spectra of [EMIm]Cl and [EMIm]Cl/FeCl<sub>3</sub> ionic liquids.

**Fig. S2** Nitrogen adsorption isotherm of the sample with a final temperature of 60 °C measured at 77K (activated in vacuum at 170 °C for 12 h in advance).

**Fig. S3** <sup>13</sup>C NMR spectrum of ThCD (dissolve with deuterated acetone).

**Fig. S4** The Zeta potential diagram of Th-CDP and GAC in the range of pH 2–12.

**Fig. S5** Model fitting results of adsorption kinetic for four PPCPs by Th-CDP and GAC.

**Fig. S6** Model fitting results of adsorption isotherm for four PPCPs by Th-CDP and GAC.

**Table S1** The MRM (multiple reaction monitoring) parameters of the four PPCPs in mass spectrometry.

**Table S2** Mass spectrometry methods of the four PPCPs.

**Table S3** Elemental analysis results of Th-CDP.

**Table S4** Physicochemical properties and structure diagram of PPCPs studied in this work.

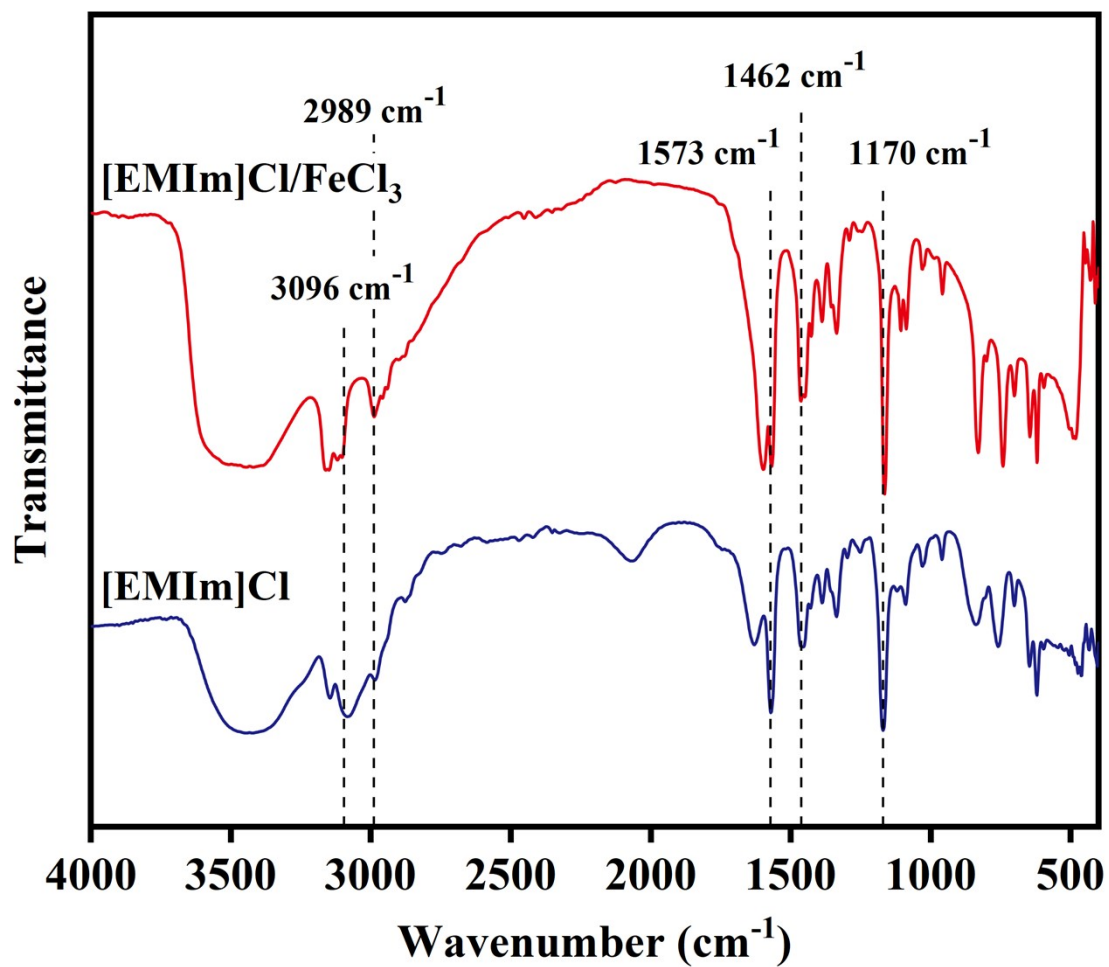

Fig. S1. IR spectra of  $[\text{EMIm}]\text{Cl}$  and  $[\text{EMIm}]\text{Cl}/\text{FeCl}_3$  ionic liquids.

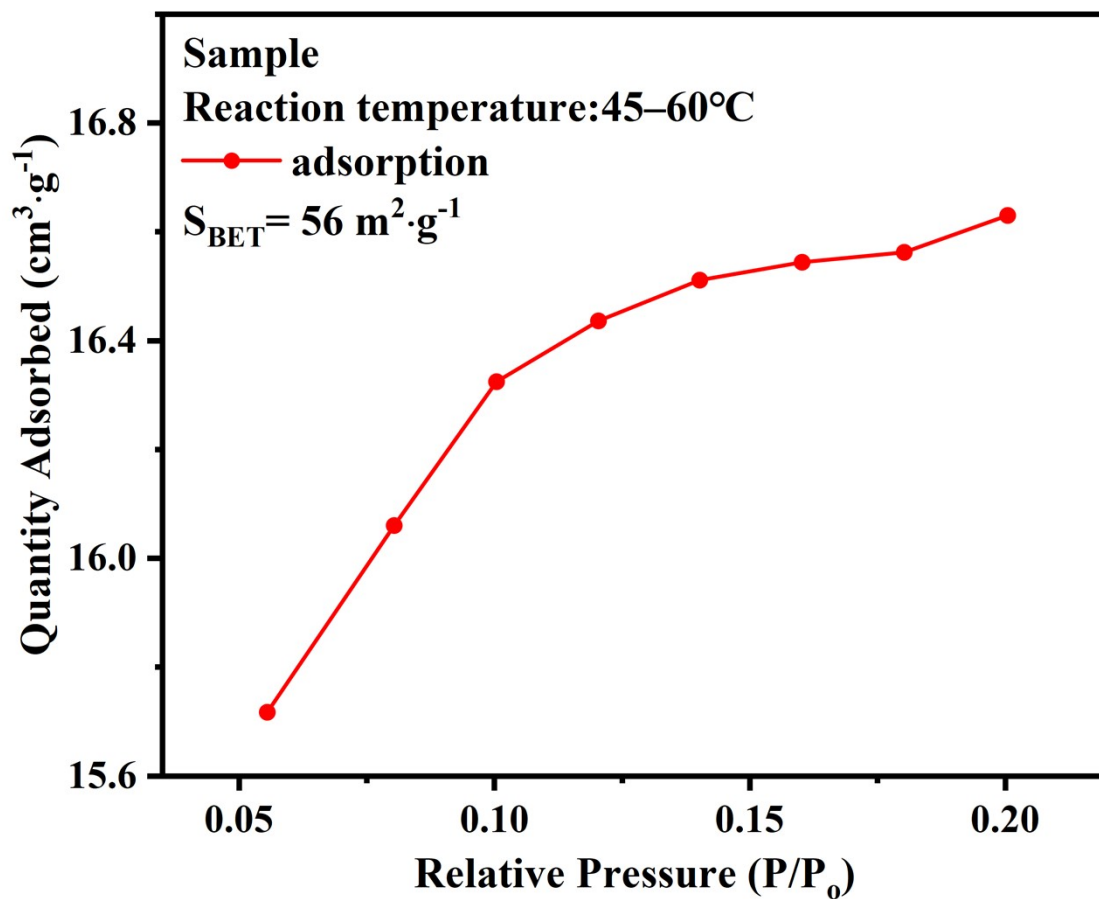

Fig. S2 Nitrogen adsorption isotherm of the sample with a final temperature of 60 °C measured at 77K (activated in vacuum at 170 °C for 12 h in advance).

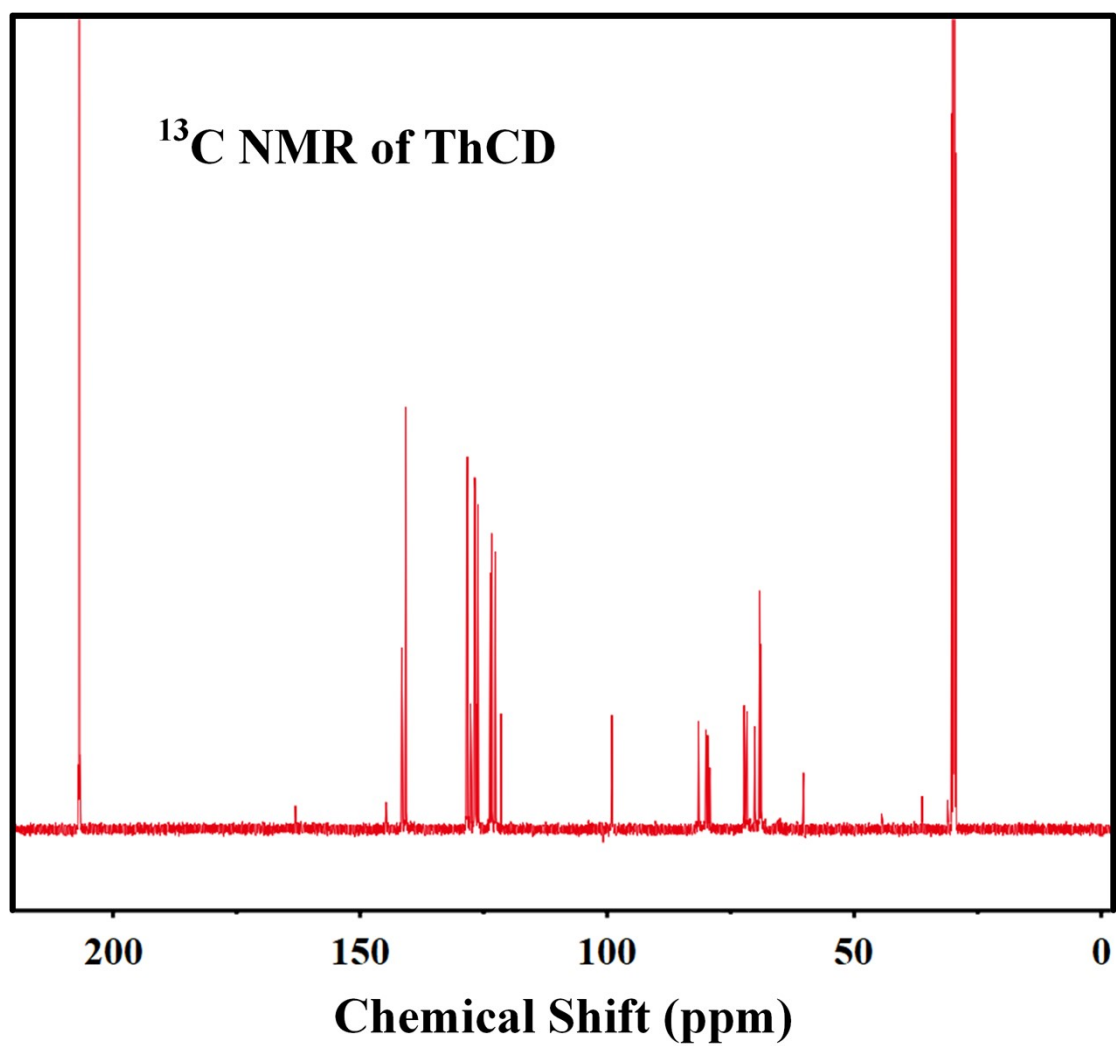

**Fig. S3**  $^{13}\text{C}$  NMR spectrum of ThCD (dissolve with deuterated acetone).

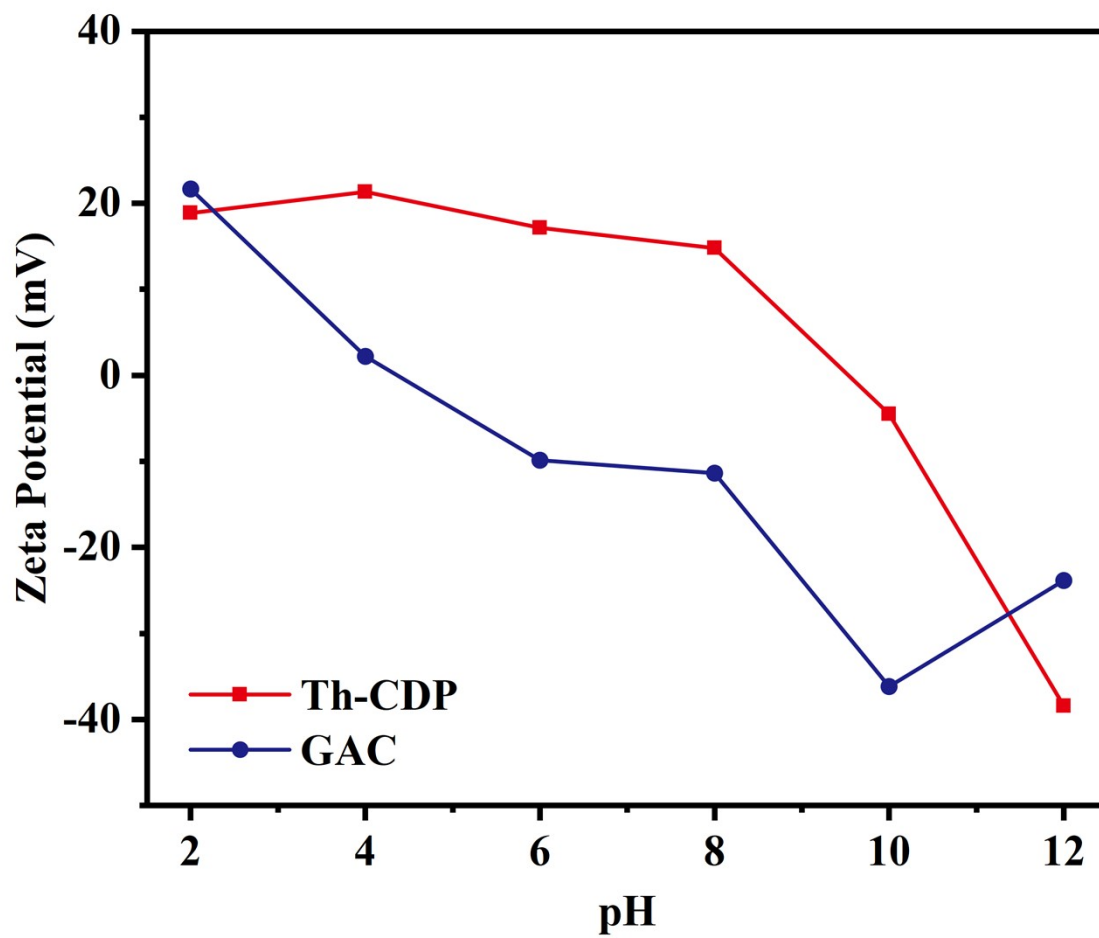

Fig. S4 The Zeta potential diagram of Th-CDP and GAC in the range of pH 2–12.

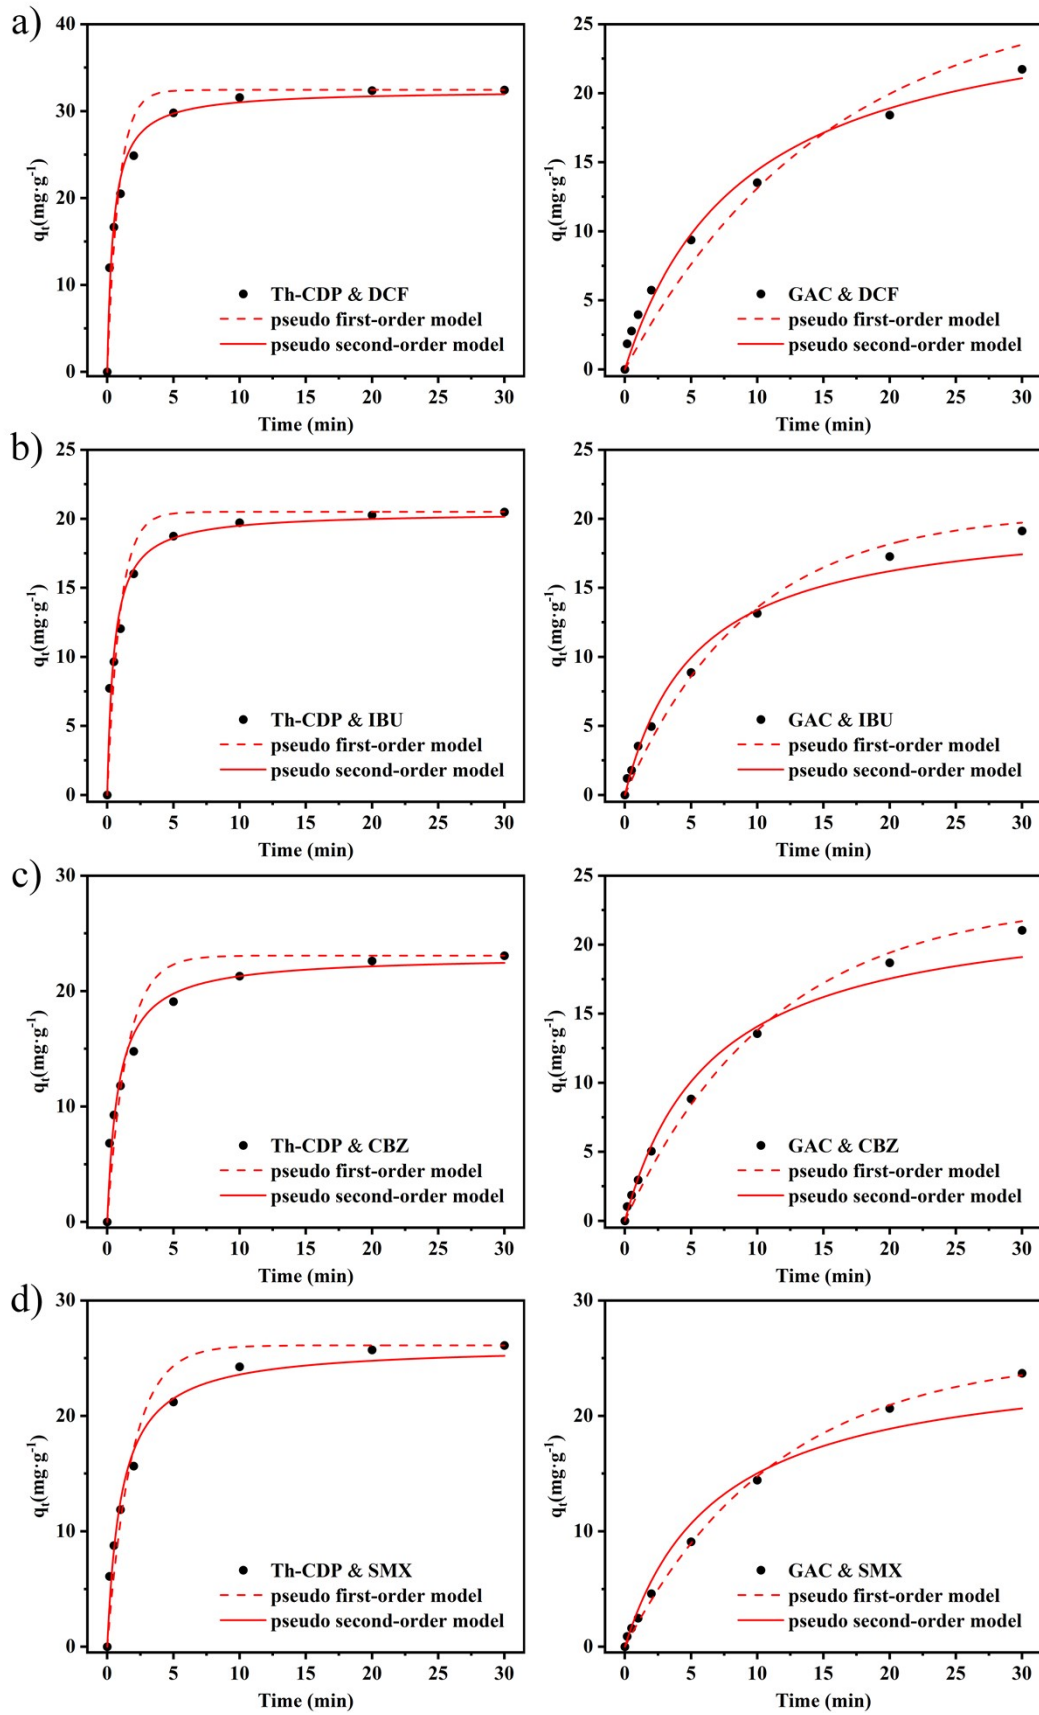

Fig. S5 Model fitting results of adsorption kinetic for four PPCPs by Th-CDP and GAC.

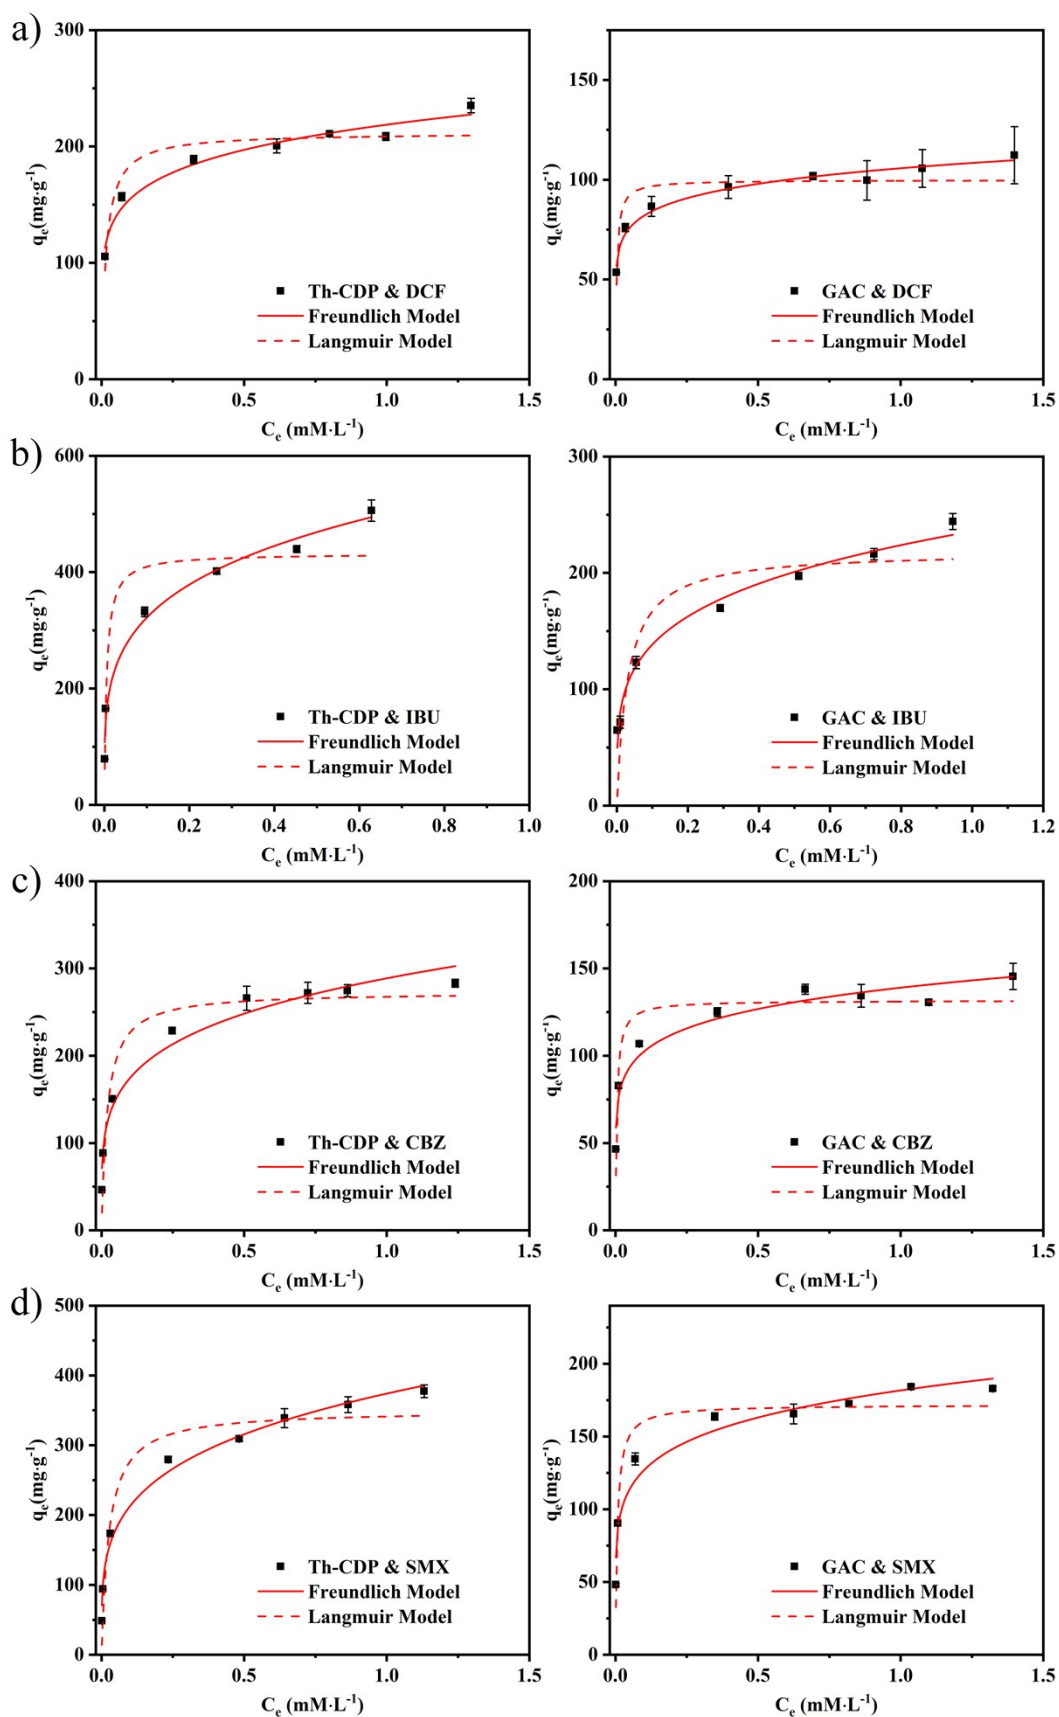

**Fig. S6** Model fitting results of adsorption isotherm for four PPCPs by Th-CDP and GAC.



**Table S1** The MRM (multiple reaction monitoring) parameters of the four PPCPs in mass spectrometry.

| Compound | Polarity | Precursor | Product ion | CE    | DP    |
|----------|----------|-----------|-------------|-------|-------|
| DCF      | Negative | 294.1     | 249.9       | -15.8 | -49.7 |
|          |          |           | 213.9       | -27.7 | -43.4 |
| IBU      | Negative | 205.1     | 161.0       | -10.8 | -42.0 |
| CBZ      | Positive | 237.0     | 194.0       | 26.0  | 81.0  |
|          |          |           | 179.1       | 48.0  | 77.0  |
| SMX      | Positive | 254.1     | 155.9       | 22.0  | 69.0  |
|          |          |           | 108.0       | 34.0  | 71.0  |

**Table S2** Mass spectrometry methods of the four PPCPs.

| Parameters       | Negative | Positive |
|------------------|----------|----------|
| Collision Gas    | 4        | 4        |
| Curtain Gas      | 20       | 35       |
| Ion Source Gas 1 | 45       | 45       |
| Ion Source Gas 2 | 55       | 55       |
| IonSpray Voltage | -4500    | 5500     |
| Temperature      | 600      | 550      |
| Interface Heater | On       | On       |

**Table S3** Elemental analysis results of Th-CDP.

| Sample | C (wt%) | H (wt%) | O (wt%) | N (wt%) | S (wt%) |
|--------|---------|---------|---------|---------|---------|
| Th-CDP | 55.76   | 2.989   | 12.740  | 0.55    | 24.797  |

**Table S4** Physicochemical properties and structure diagram of PPCPs studied in this work.

| Pollutants | $M_w$ (g mol <sup>-1</sup> ) | logK <sub>ow</sub> <sup>a</sup> | $C_s$ (mg L <sup>-1</sup> ) <sup>b</sup> | pK <sub>a</sub> <sup>c</sup> | Diagram                                                                              |
|------------|------------------------------|---------------------------------|------------------------------------------|------------------------------|--------------------------------------------------------------------------------------|
| DCF        | 318.13                       | 4.02                            | 15906.5                                  | 4.18                         | 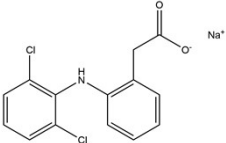  |
| IBU        | 206.28                       | 3.79                            | 21                                       | 4.41                         |   |
| CBZ        | 236.27                       | 2.25                            | 38                                       | 13.94                        |   |
| SMX        | 253.28                       | 0.48                            | 610                                      | 5.81                         |  |

<sup>a</sup> Log K<sub>ow</sub> (KOWWIN v1.67 estimate) implemented in the ChemSpider database;

<sup>b</sup> Water Solubility obtained by the ChemSpider database;

<sup>c</sup> Calculated using the Advanced Chemistry Development (ACD/Labs) Software V11.02, as implemented in the SciFinder CAS database.
